# Supplementary material for: Comparative genomic analysis of carbon and nitrogen assimilation mechanisms in three indigenous bioleaching bacteria: predictions and validations
Source: PubMed Central journal article supplement (PMC2607301; doi:10.1186/1471-2164-9-581), 2008-12-03
Supplement: 1471-2164-9-581-S3.pdf [file 1471-2164-9-581-S3.pdf]

Oligonucleotides used for RT-PCR reactions

| Number | Sequence                 | Target gene |
|--------|--------------------------|-------------|
| 1      | AGCCGGAAGTTGTCGCATAAT    | <i>ccsA</i> |
| 2      | GCCCACAGACGGAACATAGCA    | <i>ccsB</i> |
| 3      | CCGGTCAAGGTGGCGTTTTACTAC | <i>ccsB</i> |
| 4      | CTGCGTCAAGGTCTGGTCAATCT  | <i>acnA</i> |
| 5      | CCGCCCTTGCCCCGATGTA      | <i>acnA</i> |
| 6      | AGATAGCCTCCGCGAAACTGAC   | <i>ccl1</i> |
| 7      | GGCGCGATCGAGCAGTGTG      | <i>ccl1</i> |
| 8      | CCAGTGCATCCTTCTGCAC      | <i>orf1</i> |
| 9      | CCGGACTGTCGTGGCCTACTTFA  | <i>orf1</i> |
| 10     | ACCTGCCATTCTTGCCGTTGAT   | <i>fdrB</i> |
| 11     | TGTCATGTGCGGTCTCTGTGTT   | <i>fdrB</i> |
| 12     | GAATGACCTCCCCCTTGTGG     | <i>fdrA</i> |
| 13     | TTGCTGGAAGTGTCTGTCTACG   | <i>fdrA</i> |
| 14     | GCTTCCGGGCCAGTTTTA       | <i>sucC</i> |
| 15     | GGTGGCGGAAGAGCTGTTTGAG   | <i>sucC</i> |
| 16     | TTTGCCCCGTCTGGAGTAATGA   | <i>sucD</i> |
| 17     | TGCCGGCCGCAATTGTTT       | <i>sucD</i> |
| 18     | GCCTTGCTCTCCCACTTTTATTCA | <i>trx</i>  |
| 19     | GACCCGGAATTGCGTGAAGC     | <i>forA</i> |
| 20     | TCGTGAGCCGGATAAAAAGTGTC  | <i>forB</i> |
| 21     | GCGGTCATGCATTCTGGTTC     | <i>forB</i> |
| 22     | GACTTGCCGTGCGTAATCACC    | <i>forG</i> |
| 23     | TCGGAAAAGTATAAGGAGACAAG  | <i>forG</i> |
| 24     | TCAAAAACATCAACCAGAAGAC   | <i>orf2</i> |
| 25     | TGCGTCAGGGGAAAAAGGTAT    | <i>orf2</i> |
| 26     | TTCCCGCTCAATCTGGTTCTG    | <i>orf3</i> |
| 27     | GGTTGAGCAGGGGAGAATG      | <i>orf3</i> |
| 28     | ATGGGGTATGCGACGGAAAAG    | <i>porA</i> |
| 29     | GCCCCGATCGGTTTCAAGTCAA   | <i>porA</i> |
| 30     | TCACCGGCTCAAACGAT        | <i>porB</i> |
| 31     | ATGGCGCCGGTGGGAAAGAAAT   | <i>porB</i> |
| 32     | GGGCTTCCATACCAATAACATCTG | <i>porG</i> |
| 33     | TATGTTCCCGGACTAAGATG     | <i>porG</i> |
| 34     | TGGCTCCGGACAATACA        | <i>porE</i> |
| 35     | GTACAATGTTGCAGAAATCAGTG  | <i>porE</i> |
| 36     | TCGCTGACCAGTTGCCCTTC     | <i>porD</i> |
